# Supplementary material for: Enhanced selectivity for photodegrading ciprofloxacin by a magnetic photocatalyst modified with a POPD–CdS heterojunction embedded imprinted layer
Source: Royal Society of Chemistry journal article supplement (doi:10.1039/c8nj05710a), 2019-01-01
Supplement: c8nj05710a1.pdf [file c8nj05710a1.pdf]

### Electronic Supplementary Information

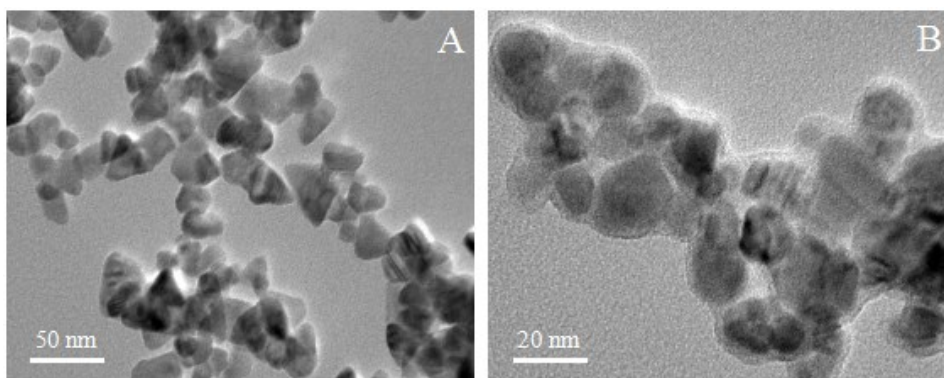

**Fig. S1.** TEM images of CdS (A) and POPD-CdS (B).

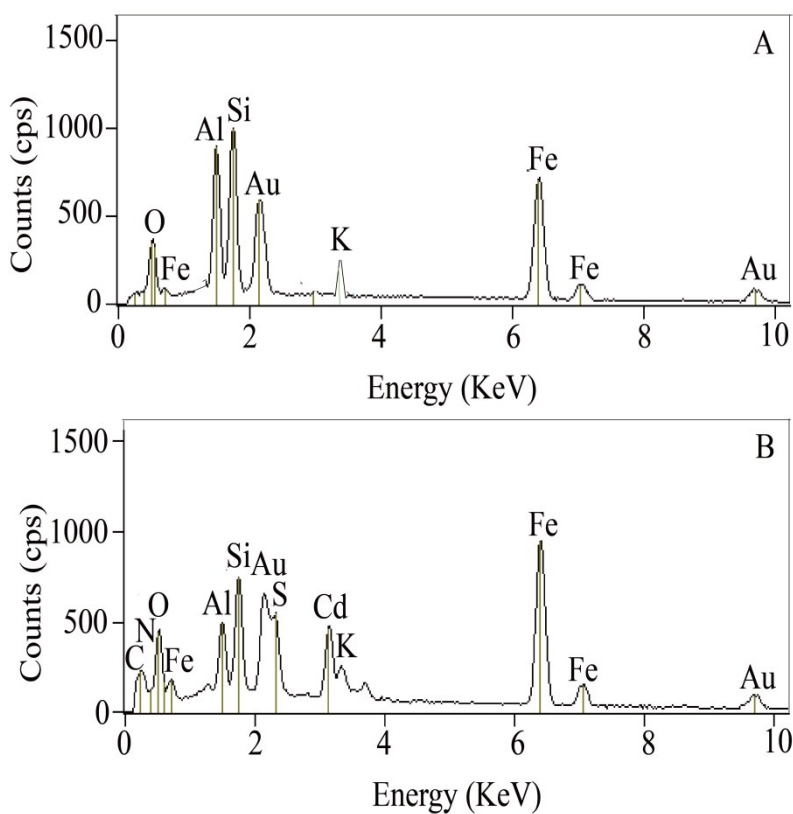

**Fig. S2.** EDS spectra of MFA (A) and POPD-CdS heterojunction embedded magnetic imprinted photocatalyst (B).

**Table S1.** BET specific surface area and average pore diameter of POPD-CdS heterojunction embedded magnetic imprinted photocatalyst (a), non-imprinted photocatalyst (b) and MFA (c).

| Samples | BET specific surface area<br>(m <sup>2</sup> /g) | Average pore diameter<br>(nm) |
|---------|--------------------------------------------------|-------------------------------|
| a       | 31.5058                                          | 3.5502                        |
| b       | 10.4621                                          | 6.7870                        |
| c       | 0.2971                                           | 0.0514                        |

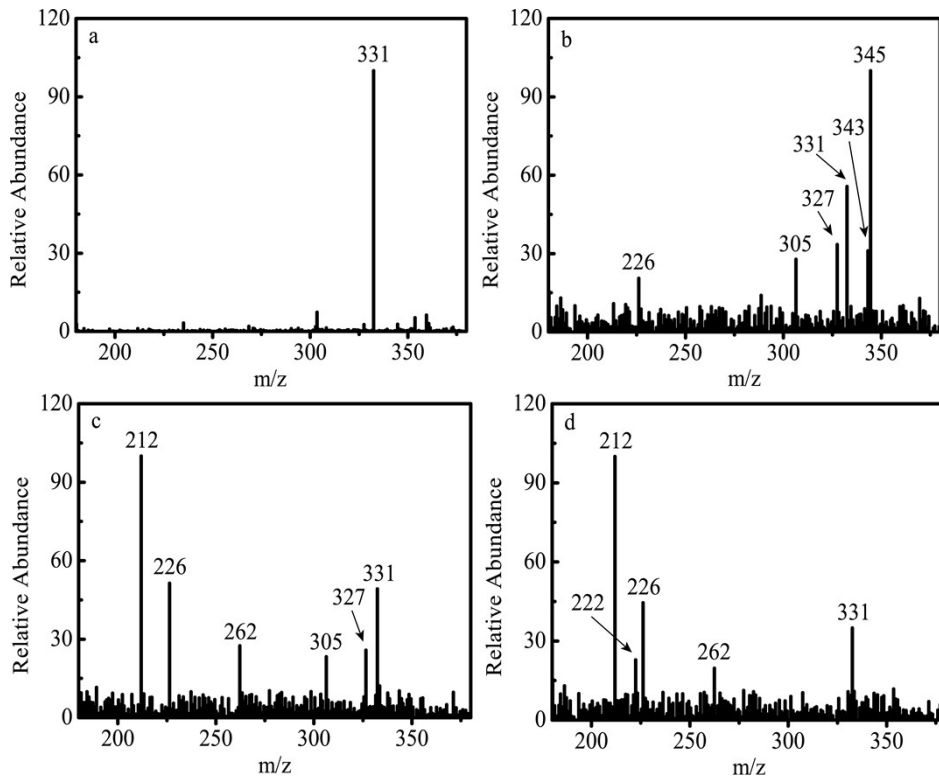

**Fig. S3.** Mass spectra of degrading CIP with POPD-CdS heterojunction embedded magnetic imprinted photocatalyst (a. the initial solution, b. degradation of CIP in 10 min, c. degradation of CIP in 30 min and d. degradation of CIP in 60 min).
